# Supplementary material
Source: PubMed Central journal article supplement (PMC5677252)
Supplement: ac7b03512_si_001.pdf [file ac7b03512_si_001.pdf]

## Supporting information

### **Integration of Ion Mobility MS<sup>E</sup> after Fully Automated, Online, High-Resolution Liquid Extraction Surface Analysis Micro-Liquid Chromatography**

Lieke Lamont,<sup>†</sup> Mark Baumert,<sup>‡</sup> Nina Ogrinc Potocnik,<sup>†</sup> Mark Allen,<sup>‡</sup> Rob Vreeken,<sup>†,§</sup> Ron M. A. Heeren,<sup>†</sup> and Tiffany Porta<sup>\*,†</sup>

<sup>†</sup> Maastricht Multimodal Molecular Imaging (M4I) Institute, Division of Imaging Mass Spectrometry, Maastricht University, Maastricht, The Netherlands

<sup>‡</sup> Advion, Harlow CM20 2NQ, United Kingdom

<sup>§</sup> Janssen Pharmaceutica, Beerse, Belgium

\* Corresponding author: [t.porta@maastrichtuniversity.nl](mailto:t.porta@maastrichtuniversity.nl)

***Table of contents:***

**List of Tables:**

**Table S-1.** Pituitary gland proteins identified from LESA- $\mu$ LC-HDMS<sup>E</sup> analysis.

**Table S-2.** Pituitary gland peptides identified from LESA- $\mu$ LC-HDMS<sup>E</sup> analysis.

**Table S-3.** Mouse brain proteins identified from LESA- $\mu$ LC-HDMS<sup>E</sup> analysis.

**Table S-4.** Mouse brain peptides identified from LESA- $\mu$ LC-HDMS<sup>E</sup> analysis.

**List of Figures:**

**Figure S-1.** H&E image of APP mouse brain with extraction spot size.

**Figure S-2.** Reproducibility of HR-LESA extraction using leucine enkephalin.

**Figure S-3.** Reproducibility and carry-over of HR-LESA- $\mu$ LC-HDMS<sup>E</sup> using leucine enkephalin.

**Figure S-4.** Reproducibility and carry-over of HR-LESA- $\mu$ LC-HDMS<sup>E</sup> using mouse brain.

**Figure S-5.** Isobaric separation of neuropeptides at  $m/z$  587.35 in APP mouse brain.

**Figure S-6.** Isobaric separation of neuropeptides at  $m/z$  587.68 in APP mouse brain.

**Figure S-7.** Extracted ion chromatograms of neuropeptides from the pituitary gland.

**Figure S-8.** Intact protein from the pituitary gland.

**Figure S-9.** MS<sup>E</sup> data and fragments of alpha-MSH extracted from the pituitary gland.

**Figure S-10.** MS<sup>E</sup> data and fragments of leucine enkephalin extracted from the pituitary gland.

**Table S-1.** Pituitary gland proteins identified from LESA- $\mu$ LC-HDMS<sup>E</sup> analysis. Data were generated using Progenesis QI for proteomics software (v2.0.5556.29015).

| <b>Accession number</b> | <b>Peptide count</b> | <b>Unique peptides</b> | <b>Confidence score</b> | <b>Description</b>                         |
|-------------------------|----------------------|------------------------|-------------------------|--------------------------------------------|
| Q7TNJ2                  | 1                    | 1                      | 2.77                    | ATP-binding cassette sub-family A member 7 |
| P01186                  | 17                   | 17                     | 155.34                  | Vasopressin-neurophysin 2-copeptin         |
| P01194                  | 25                   | 25                     | 183.60                  | Pro-opiomelanocortin                       |

**Table S-2.** Pituitary gland peptides identified from LESA- $\mu$ LC-HDMS<sup>E</sup> analysis. Data were generated using Progenesis QI for proteomics software (v2.0.5556.29015).

| Accession number | Retention time (min) | Charge | Drift time (ms) | m/z    | Measured mass | Mass error (u) | Score | Sequence                               | Modifications                                                  | Description                                | Present in LESA-MS data? (Y/N; charge state) | Present in LESA-HDMS data? (Y/N; charge state) |
|------------------|----------------------|--------|-----------------|--------|---------------|----------------|-------|----------------------------------------|----------------------------------------------------------------|--------------------------------------------|----------------------------------------------|------------------------------------------------|
| P01186           | 13.53                | 3      | 3.81            | 460.24 | 1377.69       | 0.002          | 5.75  | QESVDSAKPRVY                           |                                                                | Vasopressin-neurophysin 2-copeptin         | N                                            | N                                              |
| P01194           | 15.42                | 2      | 3.67            | 481.72 | 961.42        | -0.007         | 5.64  | MEHFRWG                                |                                                                | Pro-opiomelanocortin                       | N                                            | N                                              |
| P01194           | 15.42                | 2      | 3.67            | 481.72 | 961.42        | 0.017          | 5.69  | NVAENESAE                              |                                                                | Pro-opiomelanocortin                       | N                                            | N                                              |
| P01186           | 13.30                | 3      | 3.67            | 482.25 | 1443.73       | 0.003          | 5.77  | AGTQESVDSAKPRV                         |                                                                | Vasopressin-neurophysin 2-copeptin         | N                                            | N                                              |
| P01194           | 15.66                | 2      | 3.67            | 487.20 | 972.39        | -0.018         | 6.04  | EGEQPDGLE                              |                                                                | Pro-opiomelanocortin                       | N                                            | N                                              |
| P01194           | 15.66                | 2      | 3.67            | 487.20 | 972.39        | -0.018         | 5.39  | ELEGEQPDG                              |                                                                | Pro-opiomelanocortin                       | N                                            | N                                              |
| P01186           | 13.49                | 3      | 3.81            | 493.92 | 1478.74       | 0.004          | 6.19  | TQESVDSAKPRVY                          |                                                                | Vasopressin-neurophysin 2-copeptin         | N                                            | Y; +3                                          |
| P01186           | 13.56                | 3      | 3.88            | 512.93 | 1535.76       | 0.003          | 5.89  | GTQESVDSAKPRVY                         |                                                                | Vasopressin-neurophysin 2-copeptin         | N                                            | N                                              |
| P01194           | 13.84                | 2      | 3.88            | 534.21 | 1066.41       | -0.011         | 6.11  | ESSQCQLT                               | [5] Carbamidomethyl C                                          | Pro-opiomelanocortin                       | N                                            | N                                              |
| P01186           | 13.61                | 3      | 4.09            | 536.61 | 1606.80       | 0.004          | 6.90  | AGTQESVDSAKPRVY                        |                                                                | Vasopressin-neurophysin 2-copeptin         | N                                            | N                                              |
| P01186           | 13.84                | 2      | 3.81            | 542.73 | 1083.45       | 0.016          | 5.61  | CADELGCFL                              | [1] Carbamidomethyl C [7] Carbamidomethyl C                    | Vasopressin-neurophysin 2-copeptin         | Y; +2                                        | N                                              |
| P01194           | 15.97                | 3      | 3.81            | 555.61 | 1663.81       | -0.005         | 5.85  | TTESNLACIRACR                          | [9] Carbamidomethyl C [13] Carbamidomethyl C                   | Pro-opiomelanocortin                       | Y; +3                                        | N                                              |
| P01194           | 15.66                | 2      | 4.16            | 558.32 | 1114.62       | 0.001          | 5.76  | EKSQTLVTL                              |                                                                | Pro-opiomelanocortin                       | N                                            | N                                              |
| P01186           | 13.77                | 3      | 4.22            | 562.63 | 1684.88       | 0.007          | 5.77  | VQLAGTQESVDSAKPR                       |                                                                | Vasopressin-neurophysin 2-copeptin         | N                                            | N                                              |
| P01194           | 16.32                | 3      | 3.88            | 569.61 | 1705.82       | -0.004         | 5.38  | TTESNLACIRACR                          | [1] Acetyl N-TERM [9] Carbamidomethyl C [13] Carbamidomethyl C | Pro-opiomelanocortin                       | Y; +3                                        | Y; +3                                          |
| P01186           | 14.08                | 3      | 4.36            | 574.30 | 1719.88       | 0.005          | 7.01  | LAGTQESVDSAKPRVY                       |                                                                | Vasopressin-neurophysin 2-copeptin         | N                                            | N                                              |
| P01186           | 14.46                | 3      | 4.50            | 595.66 | 1783.95       | 0.005          | 6.57  | VQLAGTQESVDSAKPRV                      |                                                                | Vasopressin-neurophysin 2-copeptin         | N                                            | N                                              |
| P01186           | 14.27                | 3      | 4.57            | 616.99 | 1847.94       | 0.003          | 6.31  | QLAGTQESVDSAKPRVY                      |                                                                | Vasopressin-neurophysin 2-copeptin         | N                                            | N                                              |
| P01194           | 16.32                | 7      | 4.50            | 627.45 | 4385.07       | -0.042         | ---   | FPLEFKRELEGEQPDGLEQVLEPDTEKADGYPYRVEHF | [1] Acetyl N-TERM                                              | Pro-opiomelanocortin                       | N                                            | N                                              |
| Q7TNJ2           | 21.43                | 2      | 4.71            | 639.36 | 1276.71       | 0.004          | 2.77  | AVATVAQSFLLSA                          |                                                                | ATP-binding cassette sub-family A member 7 | N                                            | N                                              |
| P01194           | 17.18                | 4      | 4.64            | 640.80 | 2559.18       | 0.001          | 5.65  | GPRNSSAGGSAQRRAEEETAGGDGR              |                                                                | Pro-opiomelanocortin                       | N                                            | N                                              |
| P01186           | 14.70                | 3      | 4.71            | 650.01 | 1947.02       | 0.013          | 7.16  | VQLAGTQESVDSAKPRVY                     |                                                                | Vasopressin-neurophysin 2-copeptin         | N                                            | N                                              |
| P01186           | 15.20                | 3      | 5.19            | 687.71 | 2060.10       | 0.007          | 6.30  | LVQLAGTQESVDSAKPRVY                    |                                                                | Vasopressin-neurophysin 2-copeptin         | N                                            | N                                              |
| P01194           | 15.42                | 3      | 4.16            | 706.36 | 2116.06       | -0.002         | 5.84  | RPVKVYPNVAENESAEAF                     |                                                                | Pro-opiomelanocortin                       | N                                            | N                                              |
| P01194           | 16.32                | 6      | 4.99            | 731.85 | 4385.08       | -0.032         | 5.22  | FPLEFKRELEGEQPDGLEQVLEPDTEKADGYPYRVEHF | [1] Acetyl N-TERM                                              | Pro-opiomelanocortin                       | N                                            | N                                              |
| P01186           | 14.30                | 2      | 5.26            | 765.40 | 1528.78       | 0.004          | 5.87  | VQLAGTQESVDSAKP                        |                                                                | Vasopressin-neurophysin 2-copeptin         | N                                            | N                                              |
| P01186           | 18.02                | 4      | 5.19            | 767.44 | 3065.71       | 0.013          | 6.05  | GPARELLRLVQLAGTQESVDSAKPRVY            |                                                                | Vasopressin-neurophysin 2-copeptin         | N                                            | N                                              |
| P01186           | 13.56                | 2      | 5.47            | 768.89 | 1535.76       | -0.001         | 5.89  | GTQESVDSAKPRVY                         |                                                                | Vasopressin-neurophysin 2-copeptin         | N                                            | N                                              |
| P01194           | 18.30                | 4      | 4.99            | 773.63 | 3090.50       | -0.042         | 5.53  | LLLALLQTSIDVWSWCLESSQCQDL              | [17] Carbamidomethyl C [23] Carbamidomethyl C                  | Pro-opiomelanocortin                       | N                                            | N                                              |
| P01186           | 15.70                | 3      | 5.40            | 777.43 | 2329.28       | 0.006          | 5.97  | LRLVQLAGTQESVDSAKPRVY                  |                                                                | Vasopressin-neurophysin 2-copeptin         | N                                            | N                                              |
| P01194           | 16.04                | 3      | 4.64            | 787.08 | 2358.20       | 0.018          | 6.92  | RPVKVYPNVAENESAEAFPLE                  |                                                                | Pro-opiomelanocortin                       | N                                            | N                                              |
| P01194           | 16.04                | 3      | 4.64            | 787.08 | 2358.20       | -0.015         | 5.10  | LLACIRACRLDLSAETPVFPG                  | [4] Carbamidomethyl C [8] Carbamidomethyl C                    | Pro-opiomelanocortin                       | N                                            | N                                              |

**Table S-2 (continued).** Pituitary gland peptides identified from LESA- $\mu$ LC-HDMS<sup>E</sup> analysis. Data were generated using Progenesis QI for proteomics software (v2.0.5556.29015).

| Accession number | Retention time (min) | Charge | Drift time (ms) | m/z     | Measured mass | Mass error (u) | Score | Sequence                                              | Modifications                                                                                                                       | Description                        | Present in LESA-MS data? (Y/N; charge state) | Present in LESA-HDMS data? (Y/N; charge state) |
|------------------|----------------------|--------|-----------------|---------|---------------|----------------|-------|-------------------------------------------------------|-------------------------------------------------------------------------------------------------------------------------------------|------------------------------------|----------------------------------------------|------------------------------------------------|
| P01194           | 19.50                | 4      | 6.09            | 800.89  | 3199.52       | -0.038         | 5.41  | PDTEKADGPIRVEHFRWGNPPKDKRY                            | [1] Acetyl N-TERM                                                                                                                   | Pro-opiomelanocortin               | N                                            | N                                              |
| P01186           | 14.96                | 5      | 4.29            | 803.76  | 4013.77       | -0.077         | 5.77  | YFQNCPRGGKRAATSDMELRQLPCPGGKGRFCFP                    | [5] Carbamidomethyl C [21] Carbamidomethyl C [24] Carbamidomethyl C [32] Carbamidomethyl C                                          | Vasopressin-neurophysin 2-copeptin | N                                            | N                                              |
| P01186           | 14.08                | 2      | 5.54            | 804.41  | 1606.80       | 0.004          | 0.00  | AGTQESVDSAKPRVY                                       |                                                                                                                                     | Vasopressin-neurophysin 2-copeptin | N                                            | Y; +4                                          |
| P01186           | 13.61                | 2      | 5.54            | 804.41  | 1606.80       | 0.006          | 6.90  | AGTQESVDSAKPRVY                                       |                                                                                                                                     | Vasopressin-neurophysin 2-copeptin | N                                            | Y; +4                                          |
| P01194           | 16.01                | 2      | 5.82            | 832.91  | 1663.80       | -0.015         | 5.85  | TTESNLLACIRACR                                        | [9] Carbamidomethyl C [13] Carbamidomethyl C                                                                                        | Pro-opiomelanocortin               | N                                            | N                                              |
| P01194           | 17.18                | 3      | 4.64            | 836.10  | 2505.28       | 0.026          | 5.44  | PLTENPRKYVMGHRWDRFG                                   |                                                                                                                                     | Pro-opiomelanocortin               | N                                            | N                                              |
| P01194           | 12.53                | 2      | 5.68            | 841.89  | 1681.77       | -0.039         | 5.44  | FRWDRFGPRNSSSA                                        |                                                                                                                                     | Pro-opiomelanocortin               | N                                            | N                                              |
| P01186           | 13.77                | 2      | 6.44            | 843.44  | 1684.88       | 0.001          | 5.77  | VQLAGTQESVDSAKPR                                      |                                                                                                                                     | Vasopressin-neurophysin 2-copeptin | N                                            | N                                              |
| P01194           | 16.32                | 2      | 5.96            | 853.91  | 1705.81       | -0.017         | 5.38  | TTESNLLACIRACR                                        | [1] Acetyl N-TERM [9] Carbamidomethyl C [13] Carbamidomethyl C                                                                      | Pro-opiomelanocortin               | N                                            | N                                              |
| P01194           | 17.18                | 3      | 4.78            | 854.07  | 2559.18       | -0.001         | 5.65  | GPRNSSAGGSAQRRAEEETAGGDGR                             |                                                                                                                                     | Pro-opiomelanocortin               | N                                            | N                                              |
| P01186           | 14.08                | 2      | 6.02            | 860.95  | 1719.88       | -0.001         | 7.01  | LAGTQESVDSAKPRVY                                      |                                                                                                                                     | Vasopressin-neurophysin 2-copeptin | N                                            | N                                              |
| P01194           | 16.28                | 5      | 5.40            | 878.02  | 4385.08       | -0.033         | 5.22  | FPLEFKRELEGEQPDGLEQVLEPDTEKADGPIRVEHF                 | [1] Acetyl N-TERM                                                                                                                   | Pro-opiomelanocortin               | Y; +5                                        | Y; +5                                          |
| P01194           | 16.97                | 2      | 6.23            | 929.97  | 1857.93       | 0.009          | 5.68  | YGGFMTSEKSTPLVTL                                      |                                                                                                                                     | Pro-opiomelanocortin               | N                                            | N                                              |
| P01194           | 18.11                | 6      | 5.54            | 945.13  | 5664.76       | -0.144         | 5.19  | VGKRRPVKYPVNAENESAFAEFLPFKRELEGEQPDGLEQVLEPDTEKA      |                                                                                                                                     | Pro-opiomelanocortin               | N                                            | N                                              |
| P01186           | 14.70                | 2      | 7.06            | 974.51  | 1947.01       | 0.007          | 7.16  | VQLAGTQESVDSAKPRVY                                    |                                                                                                                                     | Vasopressin-neurophysin 2-copeptin | N                                            | N                                              |
| P01194           | 18.26                | 6      | 5.68            | 988.83  | 5926.91       | 0.002          | 5.46  | RFCNSRSAGALLALLQTSIDVWSWCLESSQCQDLTTE SNLLACIRACRL    | [1] Acetyl N-TERM [3] Carbamidomethyl C [26] Carbamidomethyl C [32] Carbamidomethyl C [44] Carbamidomethyl C [48] Carbamidomethyl C | Pro-opiomelanocortin               | N                                            | N                                              |
| P01194           | 16.97                | 4      | 4.78            | 995.98  | 3979.88       | -0.024         | 6.40  | LEPDTEKADGPIRVEHFRWGNPPKDKRYGGFMTS                    |                                                                                                                                     | Pro-opiomelanocortin               | N                                            | N                                              |
| P01194           | 17.02                | 4      | 5.47            | 1000.48 | 3997.90       | -0.032         | 5.71  | MPRFCNSRSAGALLALLQTSIDVWSWCLESSQC                     | [5] Carbamidomethyl C [28] Carbamidomethyl C [34] Carbamidomethyl C                                                                 | Pro-opiomelanocortin               | N                                            | N                                              |
| P01194           | 17.02                | 4      | 5.47            | 1000.48 | 3997.90       | -0.029         | ---   | TEKADGPIRVEHFRWGNPPKDKRYGGFMTSEKSTQ                   |                                                                                                                                     | Pro-opiomelanocortin               | N                                            | N                                              |
| P01194           | 16.97                | 4      | 4.92            | 1009.96 | 4035.80       | -0.090         | 5.90  | ELEGEQPDGLEQVLEPDTEKADGPIRVEHFRWGNP                   |                                                                                                                                     | Pro-opiomelanocortin               | N                                            | N                                              |
| P01186           | 17.99                | 3      | 6.93            | 1022.91 | 3065.69       | -0.004         | 6.05  | GPARELLRLVQLAGTQESVDSAKPRVY                           |                                                                                                                                     | Vasopressin-neurophysin 2-copeptin | N                                            | N                                              |
| P01186           | 15.20                | 2      | 7.62            | 1031.06 | 2060.10       | 0.013          | 6.30  | LVQLAGTQESVDSAKPRVY                                   |                                                                                                                                     | Vasopressin-neurophysin 2-copeptin | N                                            | N                                              |
| P01194           | 18.21                | 6      | 5.96            | 1040.17 | 6235.00       | -0.040         | 5.35  | EQPDGLEQVLEPDTEKADGPIRVEHFRWGNPPKDKRYGGFMTSEKSTPLVTLF | [41] Oxidation M                                                                                                                    | Pro-opiomelanocortin               | N                                            | N                                              |
| P01186           | 13.84                | 1      | 9.76            | 1084.45 | 1083.44       | 0.002          | 5.61  | CADELGCFL                                             | [1] Carbamidomethyl C [7] Carbamidomethyl C                                                                                         | Vasopressin-neurophysin 2-copeptin | N                                            | N                                              |
| P01194           | 18.11                | 5      | 6.16            | 1093.34 | 5461.68       | -0.095         | 6.21  | YSMEHFRWGPVGGKRRPVKYPVNAENESAFAEFL EFKRELEGEQ         |                                                                                                                                     | Pro-opiomelanocortin               | N                                            | N                                              |
| P01194           | 16.04                | 2      | 7.41            | 1180.10 | 2358.19       | 0.008          | 6.92  | RPVKVYPVNAENESAFAEFL                                  |                                                                                                                                     | Pro-opiomelanocortin               | N                                            | N                                              |
| P01194           | 16.04                | 2      | 7.41            | 1180.10 | 2358.19       | -0.026         | 5.10  | LLACIRACRLDLSAETPVFP                                  | [4] Carbamidomethyl C [8] Carbamidomethyl C                                                                                         | Pro-opiomelanocortin               | N                                            | N                                              |
| P01194           | 18.26                | 5      | 6.44            | 1186.39 | 5926.90       | -0.007         | 5.46  | RFCNSRSAGALLALLQTSIDVWSWCLESSQCQDLTTE SNLLACIRACRL    | [1] Acetyl N-TERM [3] Carbamidomethyl C [26] Carbamidomethyl C [32] Carbamidomethyl C [44] Carbamidomethyl C [48] Carbamidomethyl C | Pro-opiomelanocortin               | N                                            | N                                              |
| P01186           | 15.47                | 3      | 6.02            | 1200.21 | 3597.62       | -0.078         | 5.74  | MLAMMLNTLSACFLSLLALSACVFNCP                           | [13] Carbamidomethyl C [24] Carbamidomethyl C [29] Carbamidomethyl C                                                                | Vasopressin-neurophysin 2-copeptin | N                                            | N                                              |
| P01194           | 15.42                | 3      | 5.82            | 1206.22 | 3615.63       | -0.016         | 5.46  | WDRFGPRNSSAGGSAQRRAEEETAGGDGRPEPS                     | [1] Acetyl N-TERM                                                                                                                   | Pro-opiomelanocortin               | N                                            | N                                              |
| P01194           | 18.21                | 5      | 6.65            | 1248.01 | 6235.01       | -0.032         | 5.35  | EQPDGLEQVLEPDTEKADGPIRVEHFRWGNPPKDKRYGGFMTSEKSTPLVTLF | [41] Oxidation M                                                                                                                    | Pro-opiomelanocortin               | N                                            | N                                              |
| P01194           | 17.18                | 2      | 7.76            | 1253.64 | 2505.27       | 0.017          | ---   | PLTENPRKYVMGHRWDRFG                                   |                                                                                                                                     | Pro-opiomelanocortin               | N                                            | N                                              |
| P01194           | 16.97                | 3      | 6.58            | 1327.64 | 3979.89       | -0.019         | 6.40  | LEPDTEKADGPIRVEHFRWGNPPKDKRYGGFMTS                    |                                                                                                                                     | Pro-opiomelanocortin               | N                                            | N                                              |
| P01194           | 17.02                | 3      | 6.58            | 1333.64 | 3997.90       | -0.029         | 5.71  | MPRFCNSRSAGALLALLQTSIDVWSWCLESSQC                     | [5] Carbamidomethyl C [28] Carbamidomethyl C [34] Carbamidomethyl C                                                                 | Pro-opiomelanocortin               | N                                            | N                                              |
| P01194           | 17.02                | 3      | 6.58            | 1333.64 | 3997.90       | -0.026         | 5.51  | TEKADGPIRVEHFRWGNPPKDKRYGGFMTSEKSTQ                   |                                                                                                                                     | Pro-opiomelanocortin               | N                                            | N                                              |

**Table S-3.** Mouse brain proteins identified from LESA- $\mu$ LC-HDMS<sup>E</sup> analysis. Data were generated using Progenesis QI for proteomics software (v2.0.5556.29015).

| <b>Accession number</b> | <b>Peptide count</b> | <b>Unique peptides</b> | <b>Confidence score</b> | <b>Description</b>                                                                   |
|-------------------------|----------------------|------------------------|-------------------------|--------------------------------------------------------------------------------------|
| Q2TA51                  | 1                    | 1                      | 3.90                    | Keratin-associated protein 5-5 OS=Mus musculus GN=Krtap5-5 PE=2 SV=1                 |
| P43277                  | 3                    | 2                      | 8.71                    | Histone H1.3 OS=Mus musculus GN=Hist1h1d PE=1 SV=2                                   |
| Q64507                  | 1                    | 1                      | 3.31                    | Keratin-associated protein 5-1 OS=Mus musculus GN=Krtap5-1 PE=2 SV=1                 |
| Q8VI56                  | 1                    | 1                      | 2.08                    | Low-density lipoprotein receptor-related protein 4 OS=Mus musculus GN=Lrp4 PE=1 SV=3 |
| P43275                  | 1                    | 1                      | 3.34                    | Histone H1.1 OS=Mus musculus GN=Hist1h1a PE=1 SV=2                                   |
| Q8C0Q3                  | 1                    | 1                      | 2.76                    | Tetratricopeptide repeat protein 34 OS=Mus musculus GN=Ttc34 PE=2 SV=2               |
| O55111                  | 1                    | 1                      | 4.30                    | Desmoglein-2 OS=Mus musculus GN=Dsg2 PE=1 SV=3                                       |
| P54320                  | 2                    | 2                      | 8.74                    | Elastin OS=Mus musculus GN=Eln PE=1 SV=2                                             |
| Q9JHT5                  | 1                    | 1                      | 4.47                    | AMME syndrome candidate gene 1 protein homolog OS=Mus musculus GN=Ammecr1 PE=2 SV=1  |
| P43276                  | 1                    | 0                      | 4.90                    | Histone H1.5 OS=Mus musculus GN=Hist1h1b PE=1 SV=2                                   |

**Table S-4.** Mouse brain peptides identified from LESA- $\mu$ LC-HDMS<sup>E</sup> analysis. Data were generated using Progenesis QI for proteomics software (v2.0.5556.29015).

| Accession number | Retention time (min) | Charge | Drift time (ms) | m/z    | Measured mass | Mass error (u) | Score | Sequence       | Modifications          | Description                                                                          | Present in LESA-MS data? (Y/N; charge state) | Present in LESA-HDMS data? (Y/N; charge state) |
|------------------|----------------------|--------|-----------------|--------|---------------|----------------|-------|----------------|------------------------|--------------------------------------------------------------------------------------|----------------------------------------------|------------------------------------------------|
| P54320           | 24.99                | 1      | 5.61            | 556.31 | 555.30        | -0.004         | 4.41  | LPGVGGG        |                        | Elastin OS=Mus musculus GN=Eln PE=1 SV=2                                             | N                                            | N                                              |
| Q9JHT5           | 6.12                 | 2      | 3.81            | 597.69 | 1193.36       | -0.075         | 4.47  | SGGGGGASSSSHCS | [13] Carbamidomethyl C | AMME syndrome candidate gene 1 protein homolog OS=Mus musculus GN=Ammecr1 PE=2 SV=1  | N                                            | N                                              |
| P54320           | 21.17                | 1      | 4.50            | 610.37 | 609.36        | 0.015          | 4.32  | PGAVPAV        |                        | Elastin OS=Mus musculus GN=Eln PE=1 SV=2                                             | N                                            | N                                              |
| P43277           | 21.27                | 1      | 5.19            | 646.41 | 645.40        | 0.023          | 4.90  | AKKTGAA        |                        | Histone H1.3 OS=Mus musculus GN=Hist1h1d PE=1 SV=2                                   | Y;+1                                         | Y;+1                                           |
| P43276           | 21.27                | 1      | 5.19            | 646.41 | 645.40        | 0.023          | 4.90  | AKKTGAA        |                        | Histone H1.5 OS=Mus musculus GN=Hist1h1b PE=1 SV=2                                   | Y;+1                                         | Y;+1                                           |
| Q8V156           | 11.87                | 1      | 5.89            | 668.21 | 667.21        | -0.004         | 2.08  | SGMDGSD        |                        | Low-density lipoprotein receptor-related protein 4 OS=Mus musculus GN=Lrp4 PE=1 SV=3 | N                                            | N                                              |
| Q8C0Q3           | 20.83                | 1      | 9.00            | 718.42 | 717.41        | 0.001          | 2.76  | RKVATSG        |                        | Tetratricopeptide repeat protein 34 OS=Mus musculus GN=Ttc34 PE=2 SV=2               | N                                            | N                                              |
| Q2TA51           | 10.41                | 1      | 8.38            | 741.23 | 740.22        | -0.003         | 3.90  | GSCGSCGG       | [3] Carbamidomethyl C  | Keratin-associated protein 5-5 OS=Mus musculus GN=Krtap5-5 PE=2 SV=1                 | N                                            | N                                              |
| Q2TA51           | 11.73                | 1      | 6.37            | 741.23 | 740.22        | 0.002          | 3.46  | GSCGSCGG       | [3] Carbamidomethyl C  | Keratin-associated protein 5-5 OS=Mus musculus GN=Krtap5-5 PE=2 SV=1                 | N                                            | N                                              |
| Q64507           | 12.04                | 1      | 6.37            | 741.23 | 740.22        | 0.003          | 3.31  | SCGGCGSG       | [2] Carbamidomethyl C  | Keratin-associated protein 5-1 OS=Mus musculus GN=Krtap5-1 PE=2 SV=1                 | N                                            | N                                              |
| Q64507           | 9.80                 | 1      | 6.44            | 741.23 | 740.23        | 0.005          | 2.94  | SCGGCGSG       | [2] Carbamidomethyl C  | Keratin-associated protein 5-1 OS=Mus musculus GN=Krtap5-1 PE=2 SV=1                 | N                                            | N                                              |
| P43277           | 21.44                | 1      | 9.56            | 788.47 | 787.47        | 0.000          | 3.81  | AAGKRKAS       |                        | Histone H1.3 OS=Mus musculus GN=Hist1h1d PE=1 SV=2                                   | N                                            | Y;+1                                           |
| O55111           | 18.12                | 1      | 8.93            | 806.33 | 805.32        | 0.010          | 4.30  | ADEVGSDN       |                        | Desmoglein-2 OS=Mus musculus GN=Dsg2 PE=1 SV=3                                       | N                                            | N                                              |
| P43275           | 21.33                | 1      | 10.11           | 873.53 | 872.53        | -0.017         | 3.34  | GAAAKTKV       |                        | Histone H1.1 OS=Mus musculus GN=Hist1h1a PE=1 SV=2                                   | N                                            | N                                              |

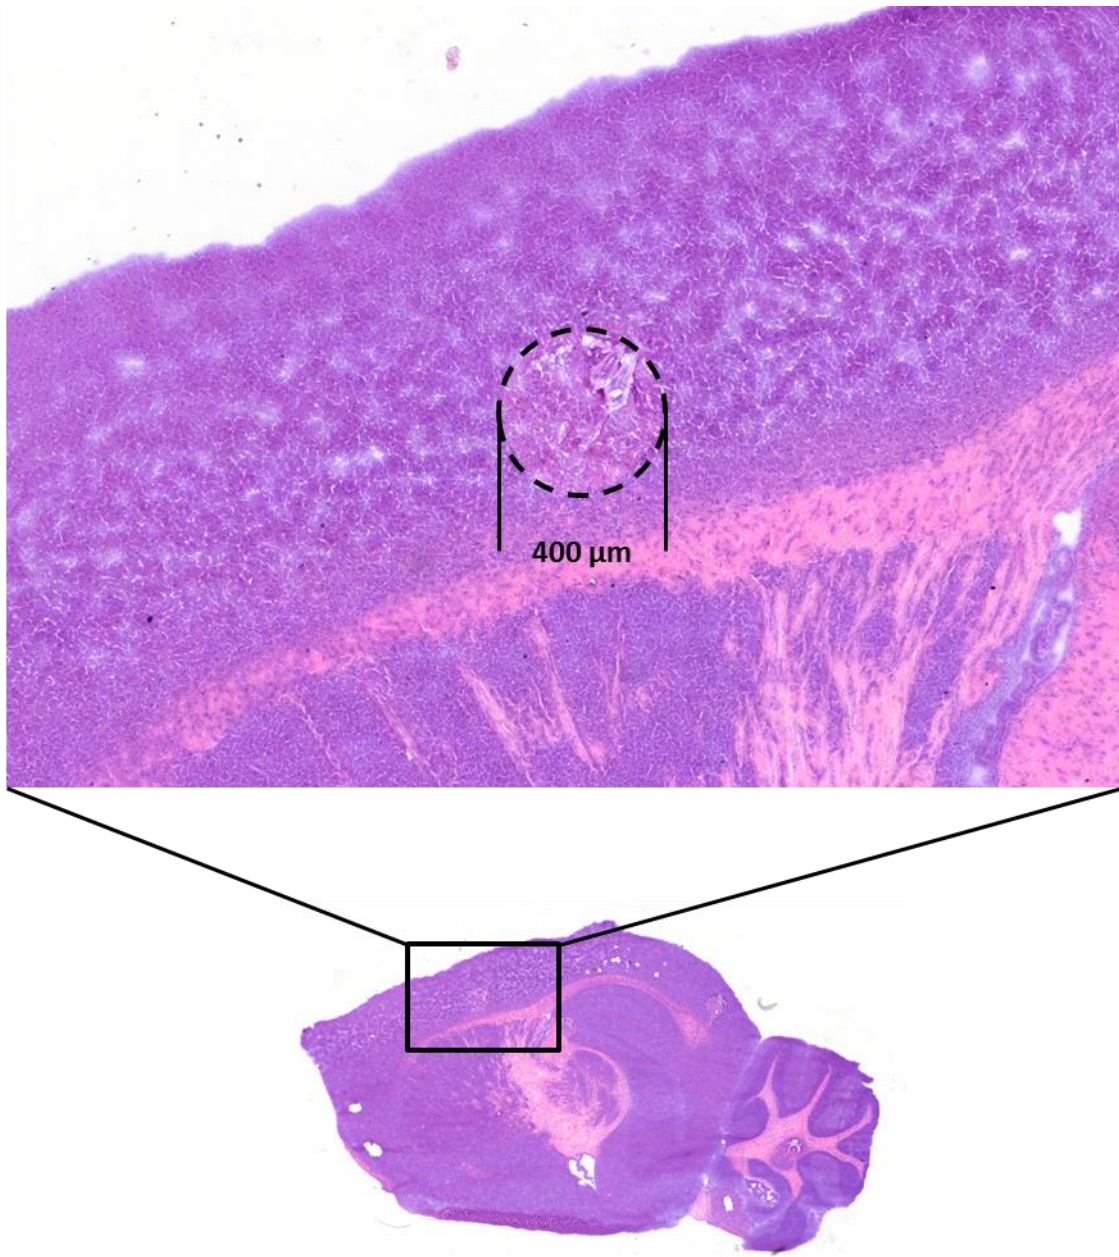

**Figure S-1.** Evaluation of the HR-LESA extraction spot size in cerebral cortex of wild-type mouse brain. By visual inspection of the H&E image of the tissue section after HR-LESA extraction, the diameter of the area sampled was of 400  $\mu\text{m}$ .



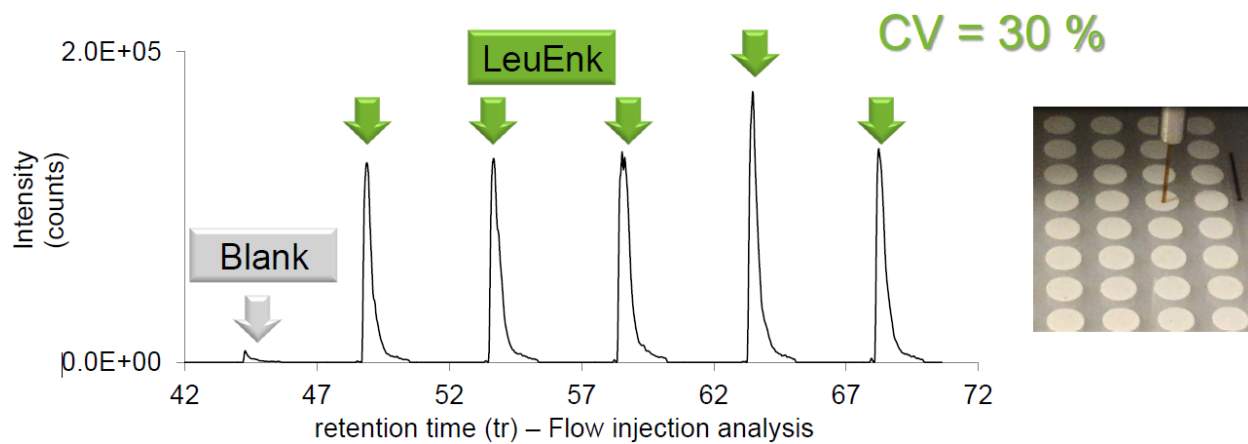

**Figure S-2.** Evaluation of the reproducibility of the extraction with the silica capillary probe followed by FIA. Results display XIC at  $m/z$  556.28 (protonated Leucine-Enkephalin ion [LeuEnk + H]<sup>+</sup>) for one blank (glass slide) followed by 5 extractions of LeuEnk using 0.9  $\mu$ L of 50% ACN + 0.1% HCOOH. Photograph displays the silica capillary probe during the extraction from the plate. CV based on absolute area (n=5)

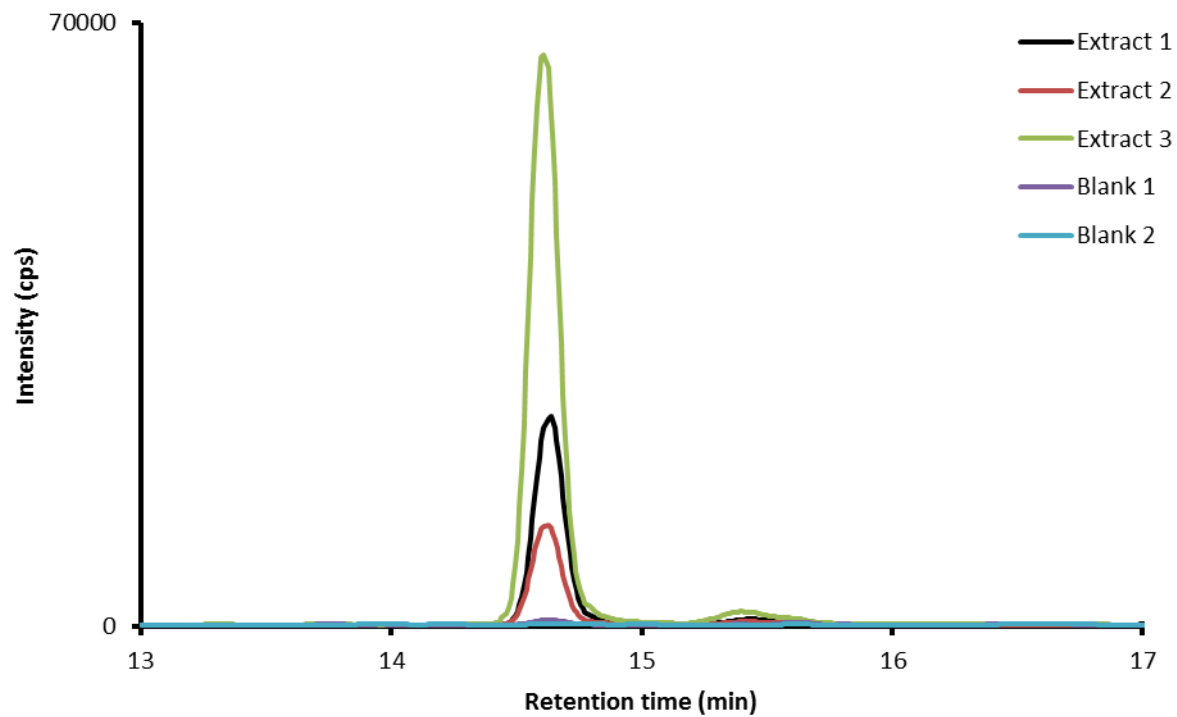

**Figure S-3.** Reproducibility of LESA- $\mu$ LC-MS platform using leucine enkephalin standard spotted onto hydrophobic plate. Three extracts were taken, followed by two blank extracts. The relative standard deviation of the retention time of the leucine enkephalin extraction is  $<0.12\%$  ( $n=3$ ). The carry-over in the first blank extraction is  $<1.1\%$  considering the absolute peak area of the last leucine enkephalin extraction versus the absolute peak area of the first blank extraction.

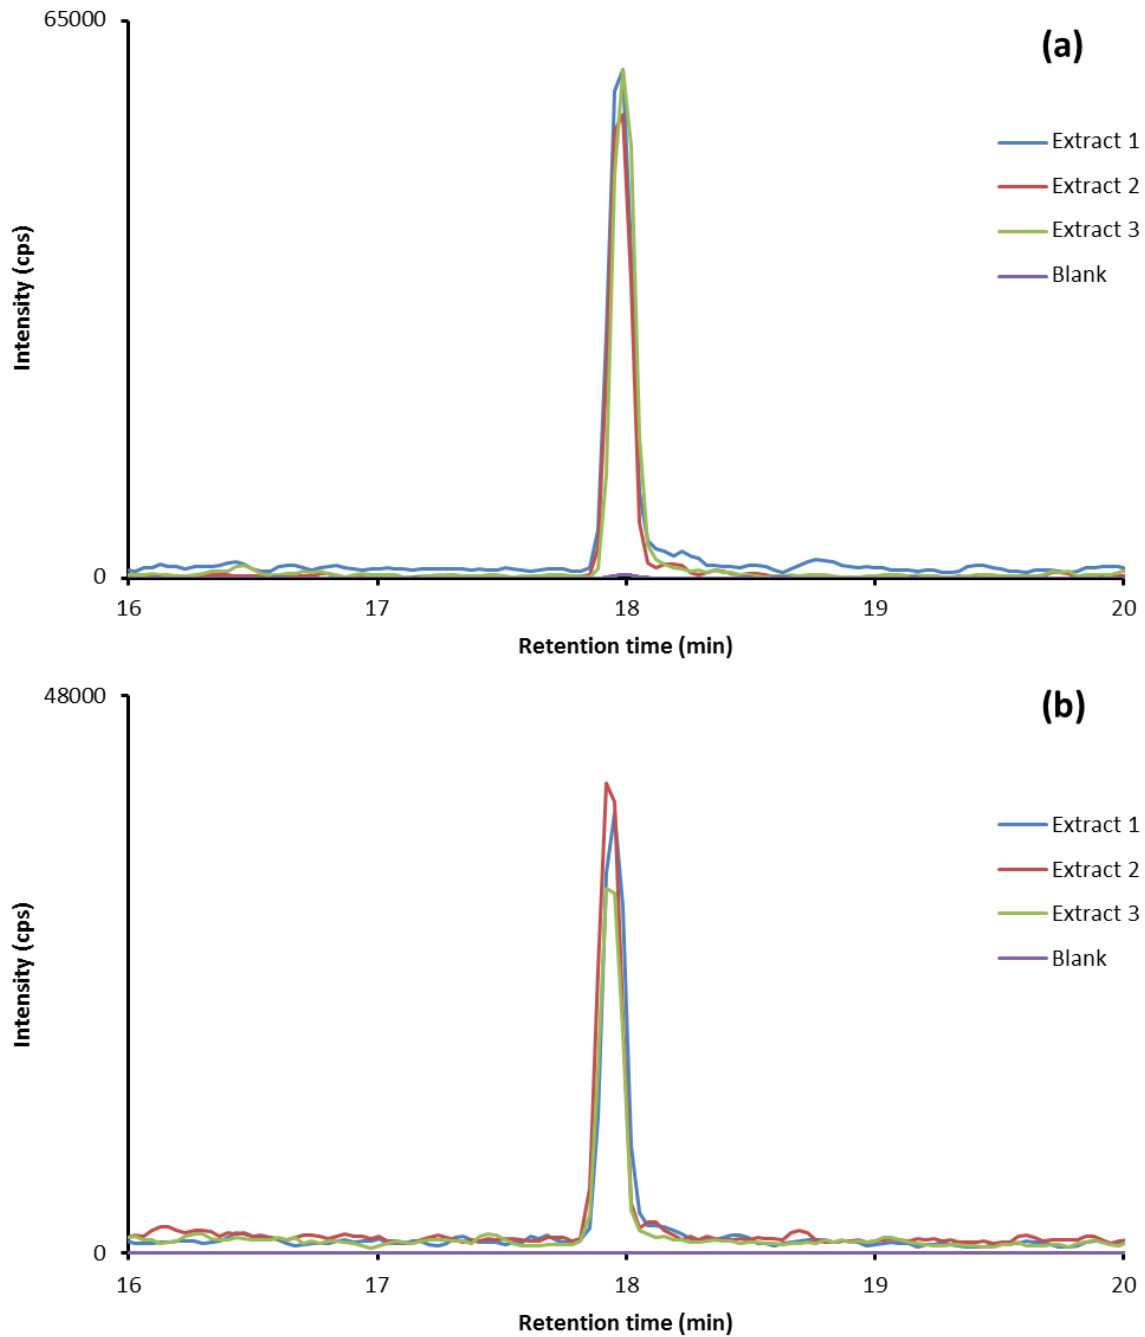

**Figure S-4.** Reproducibility of HR-LESA- $\mu$ LC-HDMS<sup>E</sup> platform using APP and WT mouse brain tissues. Three extracts from each tissue section were taken from the cerebral cortex region, followed by one blank extract from the glass slide. XIC are shown of  $m/z$  634.38 at 6.02 ms drift time from APP brain (a) and WT brain (b). The relative standard deviation for the three extractions ( $n=3$ ) considering the peak areas are 7.1% (a) and 13.3% (b). The carry-over was assessed by dividing the absolute peak area of the last brain extraction (green) by the absolute peak area of the following blank extraction (purple). Carry-over values were: 0.6% (a) and 0.7% (b).

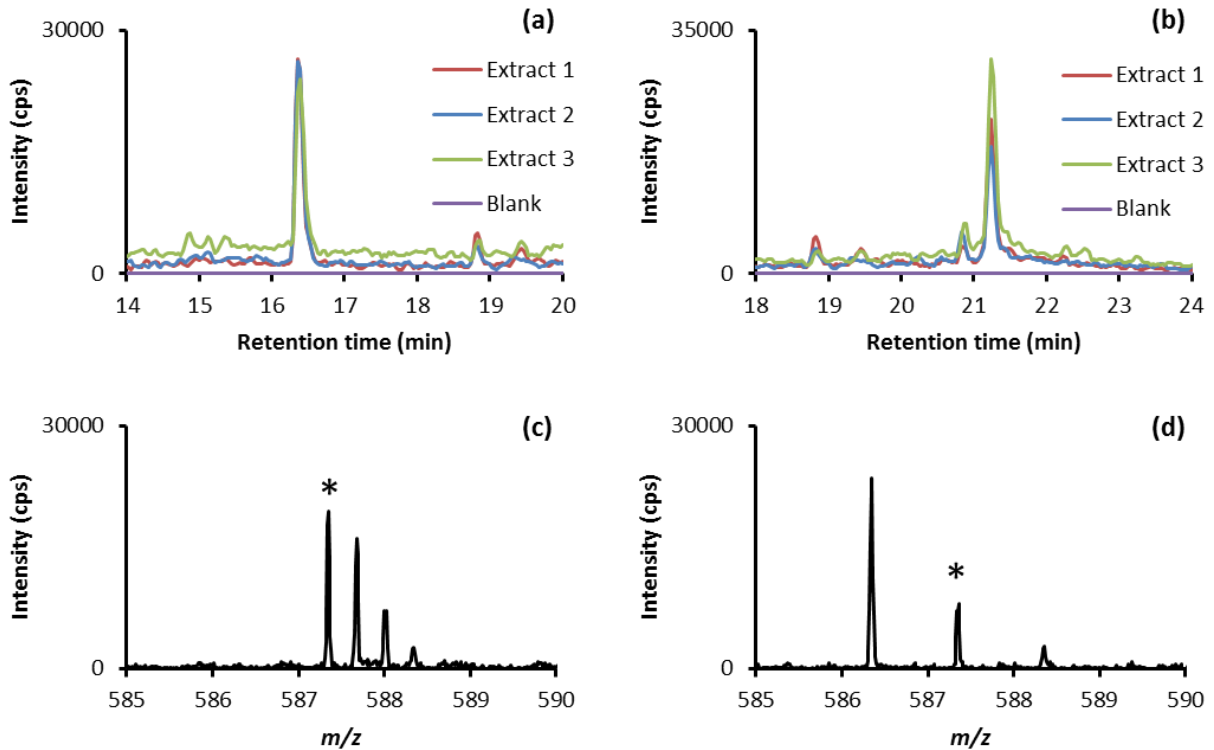

**Figure S-5.** Isobaric separation of neuropeptides in the cerebral cortex region of APP mouse brain. Three extractions were performed from the tissue section, followed by one blank extract from the glass slide. XIC are shown of  $m/z$  587.35 from APP brain with corresponding mass spectrum at retention time 16.36 min with 5.33 ms drift time (a) and 21.23 min with 8.17 ms drift time (b). The relative standard deviation of the three extractions ( $n=3$ ) at retention time 16.36 min and 21.23 min are 9.3% (a) and 25.4% (b), respectively. The carry-over was assessed by dividing the absolute peak area of the last brain extraction (green) by the absolute peak area of the following blank extraction (purple). Carry-over values were: 0.8% (at 16.36 min; 5.33 ms) and 0.7% (at 21.23 min; 8.17 ms). The asterisk (\*) corresponds to  $m/z$  used to extract the ion chromatogram (XIC).

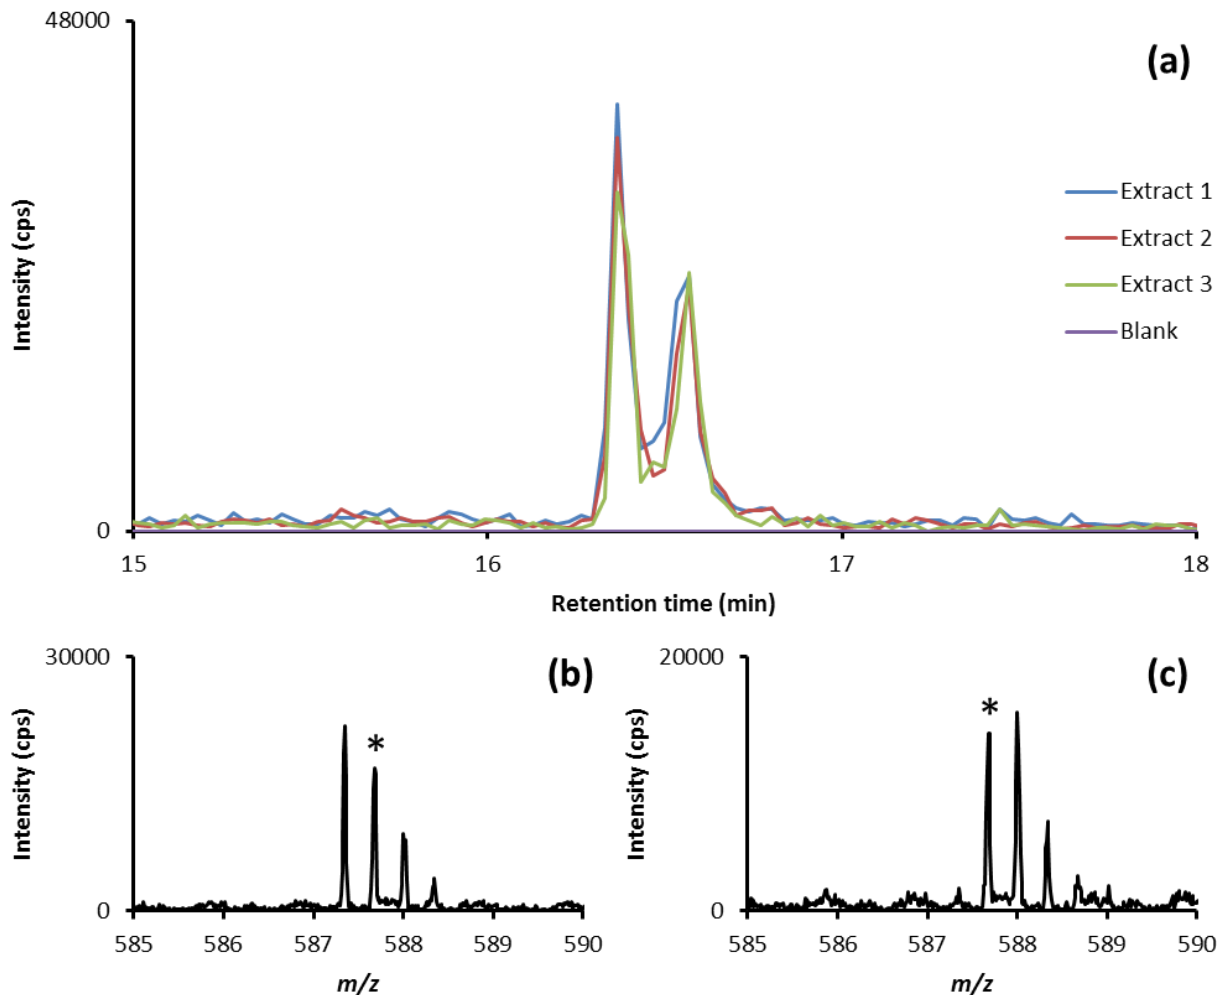

**Figure S-6.** Isobaric separation of neuropeptides in the cerebral cortex region of APP mouse brain. Three extractions were performed from the tissue section, followed by one blank extract from the glass slide. XIC are shown of  $m/z$  587.68 from APP brain (a) with corresponding mass spectrum at retention time 16.36 min (b) and 16.57 min (c) both at 5.26 ms drift time. The relative standard deviation of the three extractions ( $n=3$ ) at retention time 16.36 min and 16.57 min are 9.0% and 14.4%, respectively. The carry-over was assessed by dividing the absolute peak area of the last brain extraction (green) by the absolute peak area of the following blank extraction (purple). Carry-over values were: 0.5 % (at 16.36 min) and 0.1% (at 16.57 min). The asterisk (\*) corresponds to  $m/z$  used to extract the ion chromatogram (XIC).

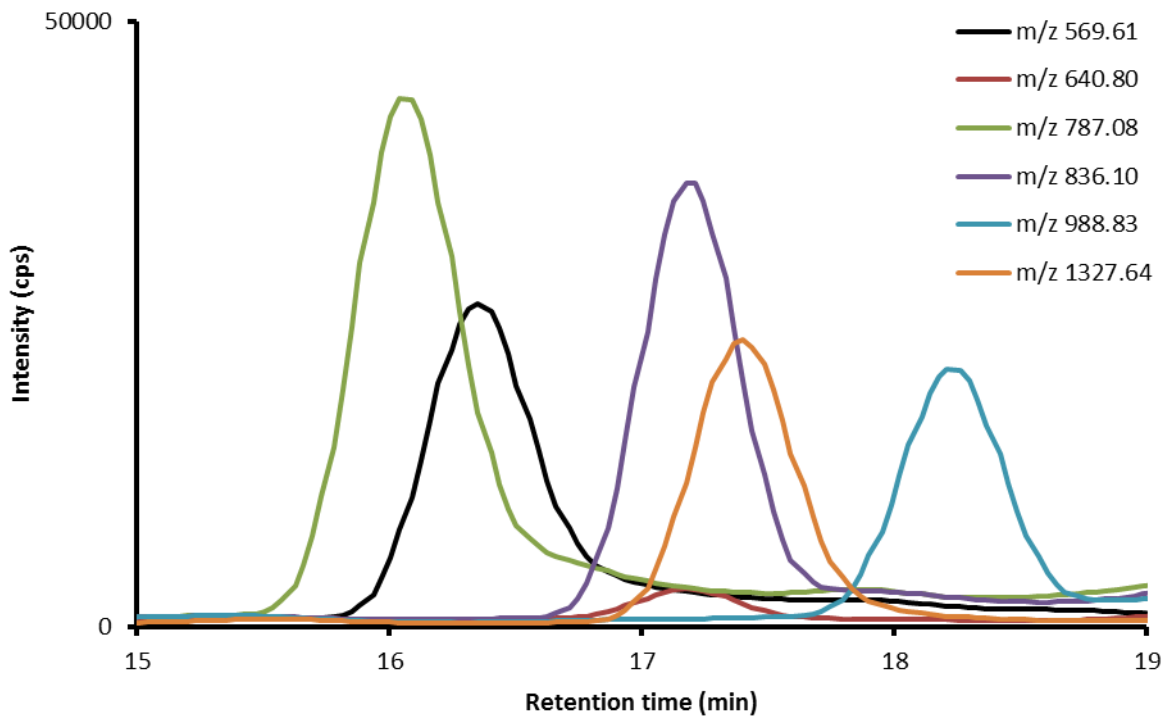

**Figure S-7.** Extracted ion chromatograms (XIC) of identified neuropeptides from the pituitary gland. The XIC of six neuropeptides are shown at the following retention times: 16.32 min ( $m/z$  569.61), 17.18 min ( $m/z$  640.80), 16.04 min ( $m/z$  787.08), 17.18 min ( $m/z$  836.10), 18.26 min ( $m/z$  988.83), and 17.40 min ( $m/z$  1327.64). These neuropeptides are derived from the pro-opiomelanocortin (POMC) precursor protein as shown in Table S-2.

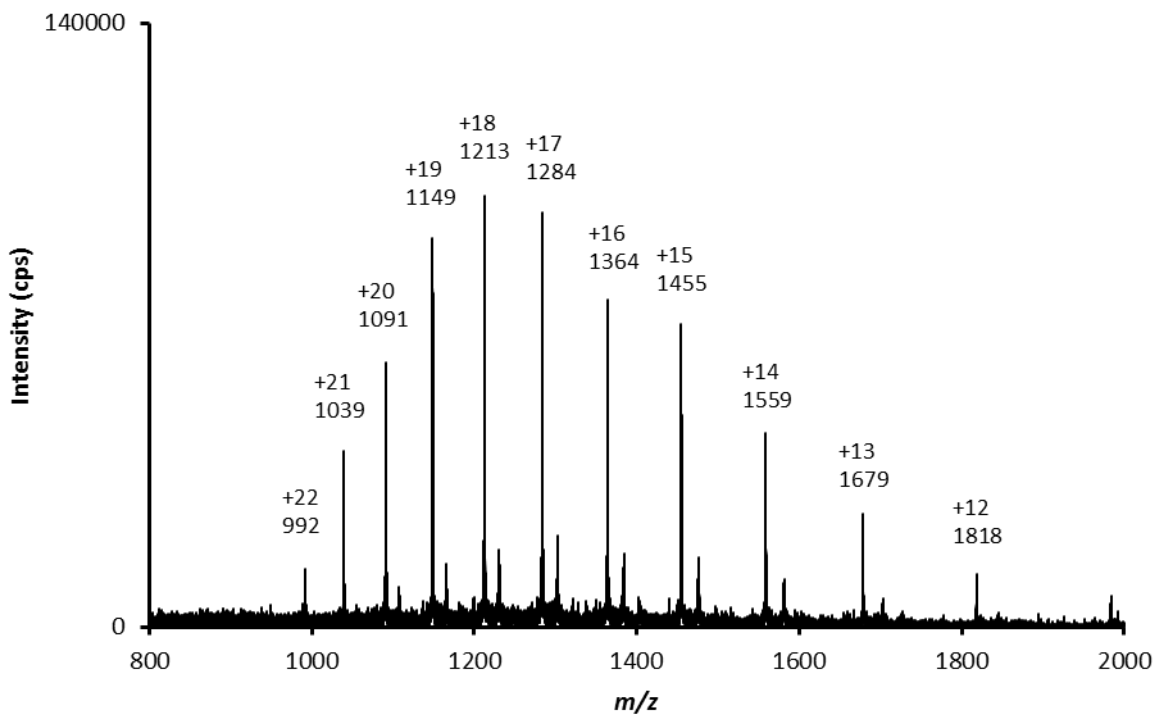

**Figure S-8.** Intact protein extracted from the adenohypophysis region of the pituitary gland. Deconvolution of the mass spectrum allowed determining the mass of an intact protein at 21832 Da. This protein was identified as POMC.

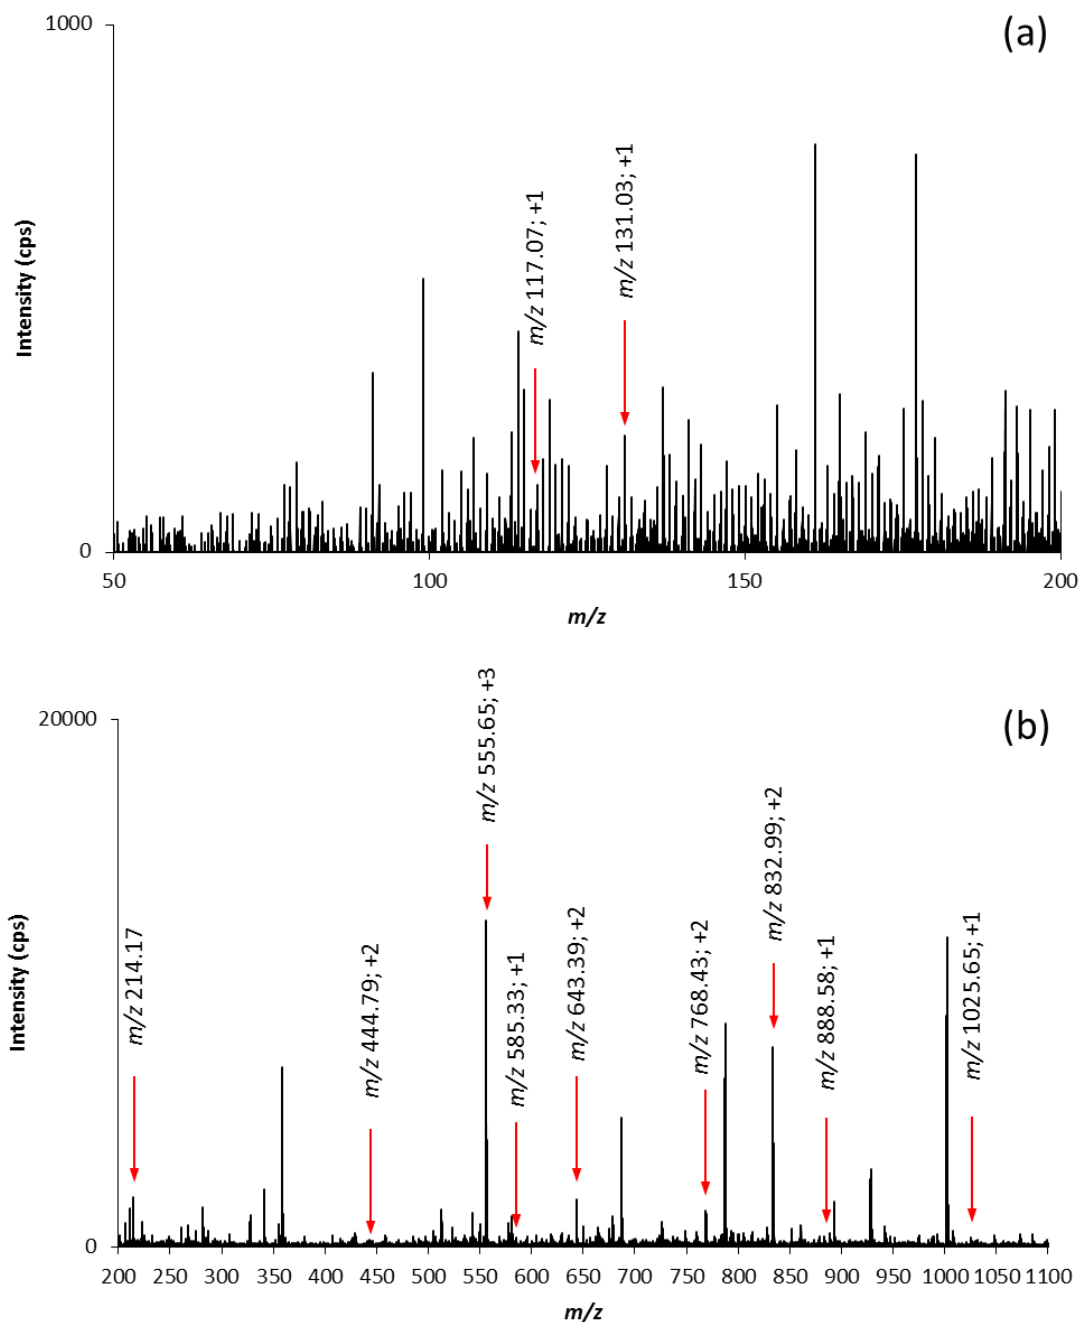

**Figure S-9.** MS<sup>E</sup> data and fragments of alpha-MSH (precursor  $m/z$  555.65, +3) extracted from the pituitary gland. Spectra are shown at high (a) and low (b) collision energy after background subtraction. Fragments from the triply charged precursor were identified as follows:  $m/z$  117.07 ( $y_1$  ion),  $m/z$  131.03 ( $b_1$  ion),  $m/z$  214.17 ( $y_2$  ion),  $m/z$  444.79 ( $y_7$  ion; +2),  $m/z$  555.65 (precursor; +3),  $m/z$  585.33 ( $y_5$  ion),  $m/z$  643.39 ( $y_{10}$  ion; +2),  $m/z$  768.43 ( $y_{12}$  ion; +2),  $m/z$  832.99 (precursor; +2),  $m/z$  888.58 ( $y_7$  ion), and  $m/z$  1025.65 ( $y_8$  ion). This data correlates with previously published data presented in Hao, G.; Gross, S. S. *Journal of the American Society for Mass Spectrometry* **2006**, 17, 1725-1730.



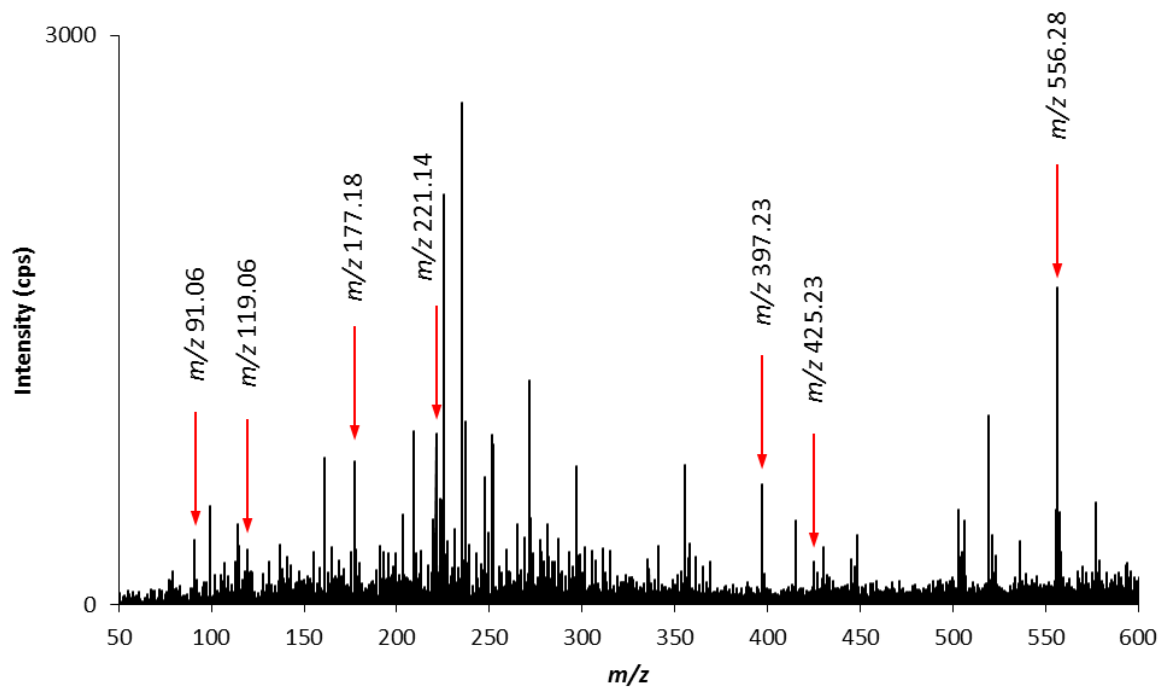

**Figure S-10.** MS<sup>E</sup> data and fragments of leucine enkephalin (precursor  $m/z$  556.28, +1) extracted from the pituitary gland. Spectrum is shown at high collision energy at 6.02 ms drift time after background subtraction.<sup>3</sup> Fragments from the triply charged precursor were identified as follows:  $m/z$  91.06,  $m/z$  119.06,  $m/z$  177.18,  $m/z$  221.14 ( $b_2$  ion),  $m/z$  397.23 ( $a_4$  ion) and  $m/z$  425.23 ( $b_4$  ion). This data is confirmed with a METLIN database search.
